# Supplementary material
Source: PubMed Central journal article supplement (PMC4409143)
Supplement: NIHMS552457-supplement-01.pdf [file NIHMS552457-supplement-01.pdf]

**Supplementary Table 1: Types of *PIK3CA* mutations in tumor types with more than 5% prevalence of *PIK3CA* mutations**

| <b>Tumor type (number of patients with <i>PIK3CA</i> mutations)</b> | <b>Type of <i>PIK3CA</i> mutation</b> | <b>Number (%)</b> |
|---------------------------------------------------------------------|---------------------------------------|-------------------|
| <b>Colorectal cancer (46)</b>                                       | E545K                                 | 13 (28)           |
|                                                                     | E542K                                 | 16 (35)           |
|                                                                     | H1047R                                | 3 (6.5)           |
|                                                                     | H1047L                                | 3 (6.5)           |
|                                                                     | Other                                 | 11 (24)           |
| <b>Ovarian cancer (16)</b>                                          | E542K                                 | 5 (31)            |
|                                                                     | E545K                                 | 2 (12.5)          |
|                                                                     | H1047R                                | 6 (37.5)          |
|                                                                     | Other                                 | 3 (19)            |
| <b>Head and neck squamous cancer (13)</b>                           | E542K                                 | 2 (15)            |
|                                                                     | E545K                                 | 7 (54)            |
|                                                                     | H1047R                                | 2 (15)            |
|                                                                     | Other                                 | 2 (15)            |
| <b>Breast cancer (21)</b>                                           | E542K                                 | 4 (19)            |
|                                                                     | E545K                                 | 5 (24)            |
|                                                                     | H1047R                                | 8 (38)            |
|                                                                     | Other                                 | 4 (19)            |
| <b>Uterine cancer (16)</b>                                          | T1025A                                | 2 (12.5)          |
|                                                                     | H1047R                                | 4 (25)            |
|                                                                     | Other                                 | 10 (62.5)         |
| <b>Cervical squamous cancer (10)</b>                                | E545K                                 | 6 (60)            |
|                                                                     | E542K                                 | 2 (20)            |
|                                                                     | Other                                 | 2 (20)            |

**Supplementary Table 2: Therapies targeting PI3K/AKT/mTOR pathway**

| <b>Treatment</b>                                                                                                   | <b>Number of patients (%)</b> | <b>PR (%)</b> | <b>SD<sub>≥6</sub> months/PR (%)</b> |
|--------------------------------------------------------------------------------------------------------------------|-------------------------------|---------------|--------------------------------------|
| <b>All</b>                                                                                                         | 136 (100)                     | 25 (100)      | 9 (100)                              |
| <b>Single agent mTORC1 inhibitors (sirolimus, nab-sirolimus, temsirolimus)</b>                                     | 24 (18)                       | 1 (4)         | 1 (11)                               |
| <b>mTORC1 inhibitors (sirolimus, everolimus, temsirolimus, ridaforilimus) combined with other targeted therapy</b> | 40 (29)                       | 10 (40)       | 4 (44.5)                             |
| <b>mTORC1 inhibitors (sirolimus, temsirolimus) combined with chemotherapy +/- other targeted therapy</b>           | 40 (29)                       | 11 (44)       | 2 (22)                               |
| <b>Single agent PI3K inhibitors</b>                                                                                | 9 (7)                         | 1 (4)         | 1 (11)                               |
| <b>Single agent dual PI3K and mTOR kinase inhibitors</b>                                                           | 6 (4)                         | 0 (0)         | 0 (0)                                |
| <b>PI3K inhibitors combined with MEK inhibitors</b>                                                                | 4 (3)                         | 0 (0)         | 1 (11)                               |
| <b>PI3K inhibitors combined with chemotherapy</b>                                                                  | 7 (5)                         | 1 (4)         | 0 (0)                                |
| <b>Single agent AKT inhibitors</b>                                                                                 | 2 (1.5)                       | 0 (0)         | 0 (0)                                |
| <b>AKT inhibitors combined with MEK inhibitors</b>                                                                 | 2 (1.5)                       | 1 (4)         | 0 (0)                                |
| <b>AKT inhibitors combined with chemotherapy</b>                                                                   | 2 (1.5)                       | 0 (0)         | 0 (0)                                |

**Supplementary Table 3: Characteristics of 25 patients with a PR**

| Tumor type                            | PIK3CA mutation | PTEN aberration | Treatment class | Drugs in combination | RECIST response (%) <sup>1</sup> | PFS in months <sup>2</sup> |
|---------------------------------------|-----------------|-----------------|-----------------|----------------------|----------------------------------|----------------------------|
| Squamous cell cervical carcinoma      | E545K, D549H    | Not done        | mTORC1          | TT and CT            | -100 <sup>1</sup>                | 2.0 <sup>2</sup> (died)    |
| Squamous cell head and neck carcinoma | 0               | Loss on IHC     | PI3K            | CT                   | -70                              | 18.4                       |
| Endometrial carcinoma                 | 0               | Loss on IHC     | AKT             | TT                   | -68                              | 9.4                        |
| Endometrial carcinoma                 | H1047R          | 0               | mTORC1          | TT and CT            | -65                              | 21.6                       |
| Metaplastic breast carcinoma          | H1047R          | 0               | mTORC1          | TT and CT            | -64                              | 11.8 <sup>3</sup>          |
| Breast carcinoma                      | 0               | Loss on IHC     | mTORC1          | TT                   | -52                              | 12.7                       |
| Endocervical adenocarcinoma           | E545K           | Loss on IHC     | mTORC1          | TT                   | -52                              | 11.0                       |
| Ovarian carcinoma                     | H1047R          | 0               | PI3K            | none                 | -50                              | 4.6                        |
| Ovarian carcinoma                     | Q546K           | Not done        | mTORC1          | TT and CT            | -49                              | 10.3                       |
| Squamous cell cervical carcinoma      | E542K           | Not done        | mTORC1          | TT and CT            | -41                              | 8.4 <sup>3</sup>           |
| Squamous cell head and neck carcinoma | H1047R          | Not done        | mTORC1          | TT                   | -38                              | 2.1                        |
| Squamous cell cervical carcinoma      | 0               | Loss on IHC     | mTORC1          | TT and CT            | -38                              | 5.7                        |
| Endometrial carcinoma                 | H1047R          | Not done        | mTORC1          | TT                   | -37                              | 8.2                        |
| Breast carcinoma                      | H1047R          | Not done        | mTORC1          | TT and CT            | -37                              | 8.5                        |
| Renal cell carcinoma                  | 0               | Loss on IHC     | mTORC1          | none                 | -37                              | 6.1                        |
| Endometrial carcinoma                 | E545K           | 0               | mTORC1          | TT and CT            | -35                              | 2.6 <sup>3</sup>           |
| Lung adenocarcinoma                   | E542K           | Not done        | mTORC1          | TT                   | -34                              | 11.2 <sup>3</sup>          |
| Ovarian carcinoma                     | H1047R          | Not done        | mTORC1          | TT and CT            | -34                              | 4.6                        |
| Breast carcinoma                      | E545K           | 0               | mTORC1          | TT                   | -34                              | 5.8                        |
| Parotid gland carcinoma               | 0               | Loss on IHC     | mTORC1          | TT                   | -33                              | 4.3                        |
| Squamous cell head and neck carcinoma | 0               | Loss on IHC     | mTORC1          | TT                   | -32                              | 11.4                       |
| Metaplastic breast carcinoma          | 0               | Loss on IHC     | mTORC1          | TT and CT            | -32                              | 9.9+                       |
| Renal cell carcinoma                  | E545K           | 0               | mTORC1          | TT                   | -31                              | 11.0+ <sup>3</sup>         |
| Melanoma                              | 0               | Loss on IHC     | mTORC1          | TT                   | -30                              | 9.5 <sup>3</sup>           |
| Endometrial carcinoma                 | 0               | Loss on IHC     | mTORC1          | TT and CT            | -30                              | 4.3                        |

*PR, partial response; RECIST, Response Evaluation Criteria in Solid Tumors; PFS, progression-free survival; TT, targeted therapy; CT, chemotherapy; IHC, immunohistochemistry; + indicates ongoing treatment at the time of analysis.*

<sup>1</sup> *Not classified as a complete response due to persistence of residual ascites.*

<sup>2</sup> *Patient died without evidence of disease progression due to bowel perforation.*

<sup>3</sup> *Patient withdrew consent or lost follow-up without evidence of disease progression.*

**Supplementary Table 4: Therapies targeting PI3K/AKT/mTOR pathway**

| <b>Treatment</b>                                                                                                            | <b>Number of patients</b> | <b>PR (%)</b> | <b>P-value<sup>1</sup></b> |
|-----------------------------------------------------------------------------------------------------------------------------|---------------------------|---------------|----------------------------|
| <b>Patients with <i>PIK3CA</i> mutations or PTEN aberrations treated with PI3K/AKT/mTOR inhibitors</b>                      | 136                       | 25 (18)       |                            |
| <b>Patients without <i>PIK3CA</i> mutations or PTEN aberrations treated with PI3K/AKT/mTOR inhibitors</b>                   | 458                       | 26 (6)        | <0.001                     |
| <b>Patients with <i>PIK3CA</i> mutations or PTEN aberrations treated with other protocols than PI3K/AKT/mTOR inhibitors</b> | 67                        | 3 (4)         | 0.008                      |

<sup>1</sup>P-value reflects comparisons to patients with PIK3CA mutations or PTEN aberrations treated with PI3K/AKT/mTOR inhibitors
